# Supplementary material
Source: Springer Nature journal article supplement (https://www.springermedizin.de/resource/supplementary/13019_2013_1560_MOESM1_ESM.pdf/9640652)

x 100.0 cm  
cut

S 291

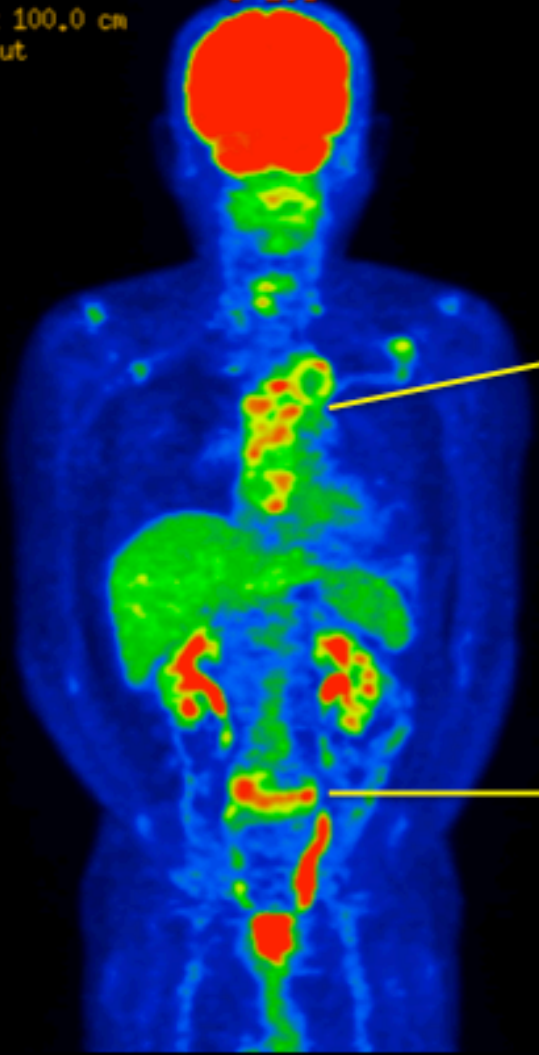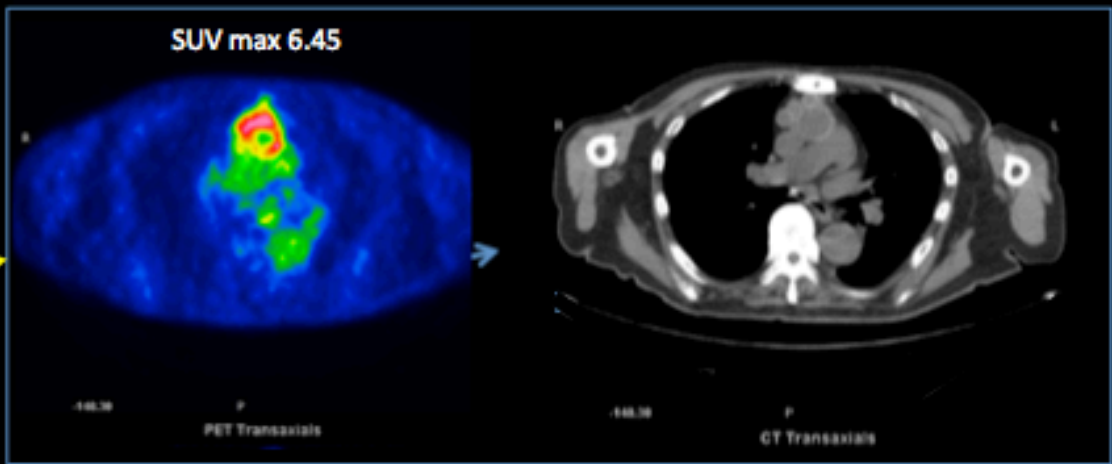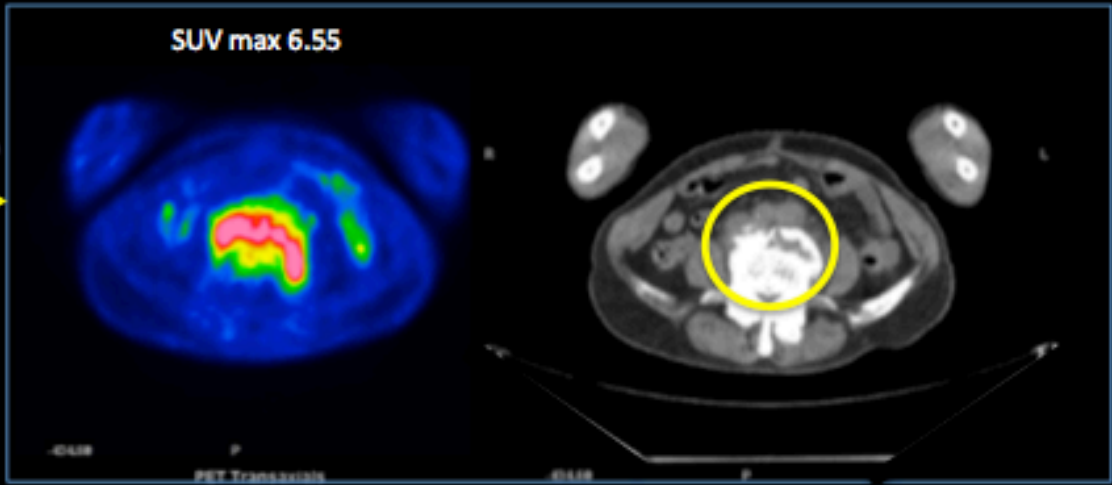

CT Transaxials

Supplement: MOESM1 [file 9640652]
